# Supplementary material
Source: publisher figshare collection journal article supplement (https://tandf.figshare.com/ndownloader/files/13764458)
Supplement: Supplementary file 1 [file 13764458]

**Supplementary Material**

**Figure captions**

Figure S1 Pyrene was cultivated with *Klebsiella* sp. LZ6 for 10 day under anaerobic conditions, and the supernatant was subjected to GC/MS analysis. Mass spectrogram of (a) Pyrene (RT-13.433min), (b) Pyrene,4,5-dihydro- (RT-13.135min), (c) Phenanthrene (RT-11.835min), (d) allyl tert-butyldimethyl phthalate-TMS derivative (RT-10.154min) and (e) 2'-hydroxypropiophenone-TMS derivative (RT-15.977min).

Figure S2 Mass spectrogram of pyrene, pyrene, 4, 5-dihydro-, penanthrene, ally tert-butyldimethylsilylphalate and propiophenone, 2'-(trimethylsiloxy)- standard

Figure S3 Pyrene was cultivated with *Klebsiella* sp. LZ6 for 20 day under anaerobic conditions, and the supernatant was subjected to GC/MS analysis. Mass spectrogram of dibenzo-p-dioxin (RT-11.634min).

Figure S4 Mass spectrogram of Dibenzo-p-dioxinstandard.

Figure S5 Phenanthrene was cultivated with *Klebsiella* sp. LZ6 for 20 day under anaerobic conditions, and the supernatant was subjected to GC/MS analysis. Mass spectrogram of (a) Phenanthrene (RT-13.433min), (b) methyl 4-hydroxycinnamate (RT-12.634min) and (c) p-Cresol -TMS derivative (RT-7.402min).

Figure S6 Mass spectrogram of phenanthrene, 2-propenoic acid, 3-(4-hydroxyphenyl)-, methyl ester and silane, trimethyl (4-methylphenoxy)-standard.

Figure S7 Phenanthrene was cultivated with *Klebsiella* sp. LZ6 for 30 day under anaerobic conditions, and the supernatant was subjected to GC/MS analysis. Mass spectrogram of 4- hydroxybenzenemethanol -TMS derivative (RT-10.307min)

Figure S8 Mass spectrogram of 4-hydroxybenzenemethanol-TMS derivative standard.

**Table captions**

Table S1 Characters of physiology and biochemistry (+ Positive reaction; +w weak reaction; - negative reaction.The strains did not assimilate D-cellobiose, D-turanose, α-D-lactose, N-acetyl-β-D-mannosamine, N-Acetyl-D-galactosamine, D-aspartic acid, Gelatin, L-serine, Mucic acid, D-saccharic acid, Methyl pyruvate, D-lactic acid methyl ester, α-hydroxy-butyric acid, α-keto-butyric acid, Acetoacetic acid, Formic acid, 8% NaCl, Lithium chloride, Sodium butyrate, Sodium bromate.)

Figure S1 Pyrene was cultivated with *Klebsiella* sp. LZ6 for 10 day under anaerobic conditions, and the supernatant was subjected to GC/MS analysis. Mass spectrogram of (a) Pyrene (RT-13.433min), (b) Pyrene,4,5-dihydro- (RT-13.135min), (c) Phenanthrene (RT-11.835min), (d) allyl tert-butyldimethyl phthalate-TMS derivative (RT-10.154min) and (e) 2'-hydroxypropiophenone-TMS derivative (RT-15.977min)

Figure S2 Mass spectrogram of pyrene, pyrene, 4, 5-dihydro-, penanthrene, ally tert-butyldimethylsilylphalate and propiophenone, 2'-(trimethylsiloxy)- standard


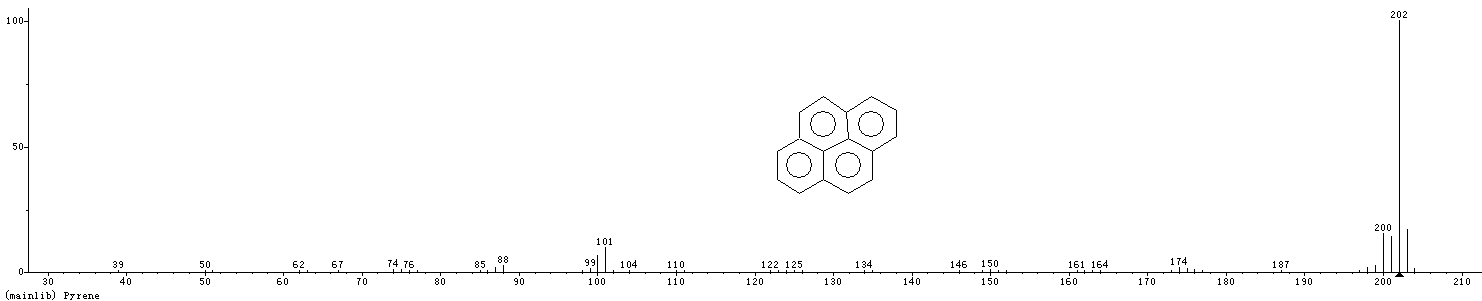


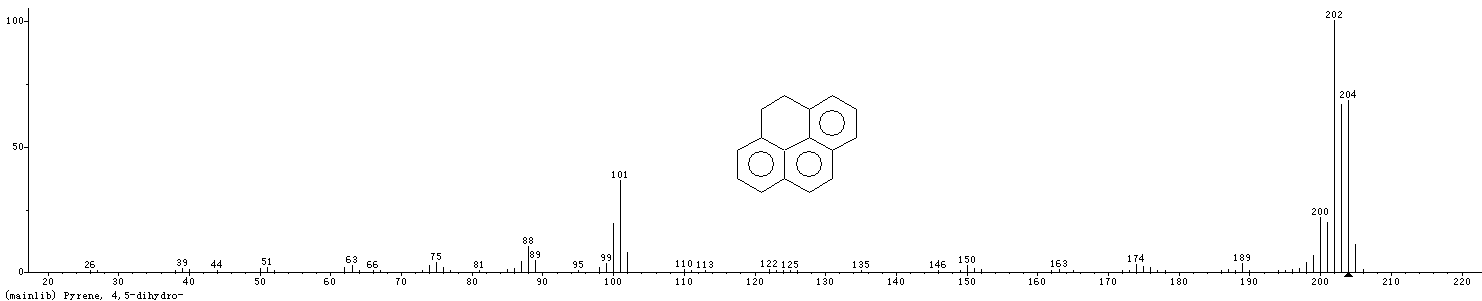


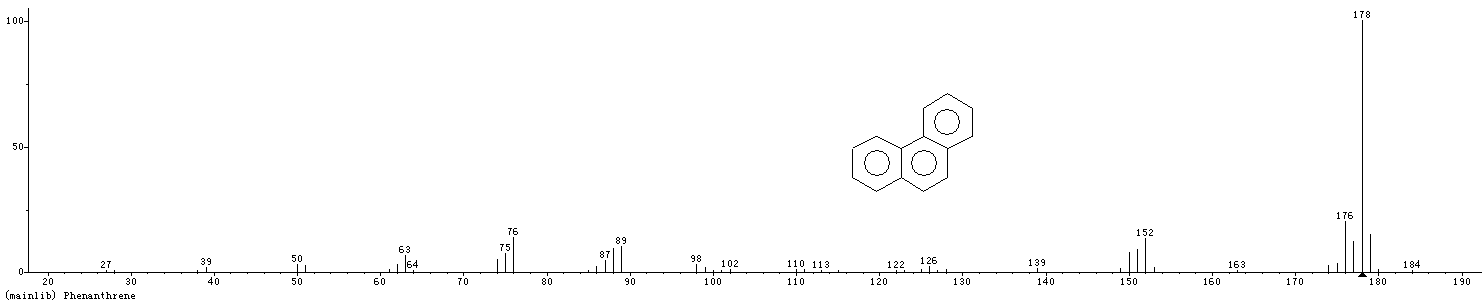


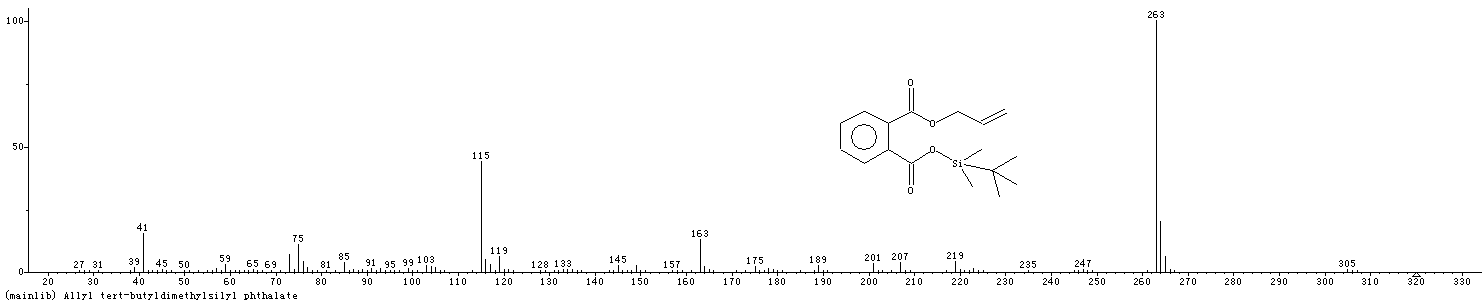


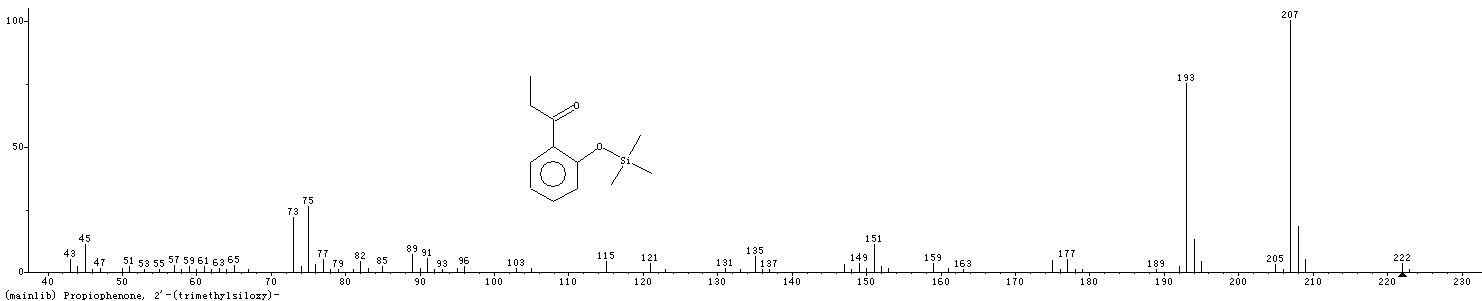


Figure S3 Pyrene was cultivated with *Klebsiella* sp. LZ6 for 20 day under anaerobic conditions, and the supernatant was subjected to GC/MS analysis. Mass spectrogram of dibenzo-p-dioxin (RT-11.634min)

Figure S4 Mass spectrogram of Dibenzo-p-dioxinstandard.


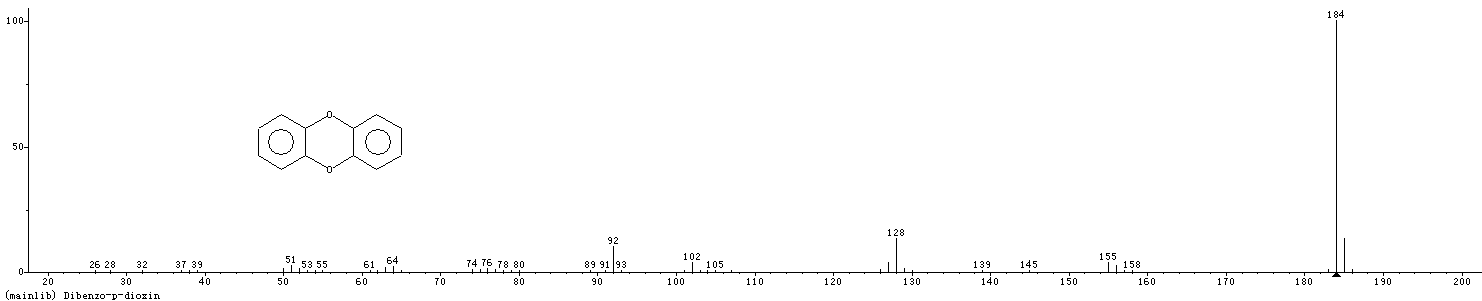


Figure S5 Phenanthrene was cultivated with *Klebsiella* sp. LZ6 for 20 day under anaerobic conditions, and the supernatant was subjected to GC/MS analysis. Mass spectrogram of (a) Phenanthrene (RT-13.433min), (b) methyl 4-hydroxycinnamate (RT-12.634min) and (c) p-Cresol -TMS derivative (RT-7.402min)

Figure S6 Mass spectrogram of phenanthrene, 2-propenoic acid, 3-(4-hydroxyphenyl)-, methyl ester and silane, trimethyl (4-methylphenoxy)-standard.


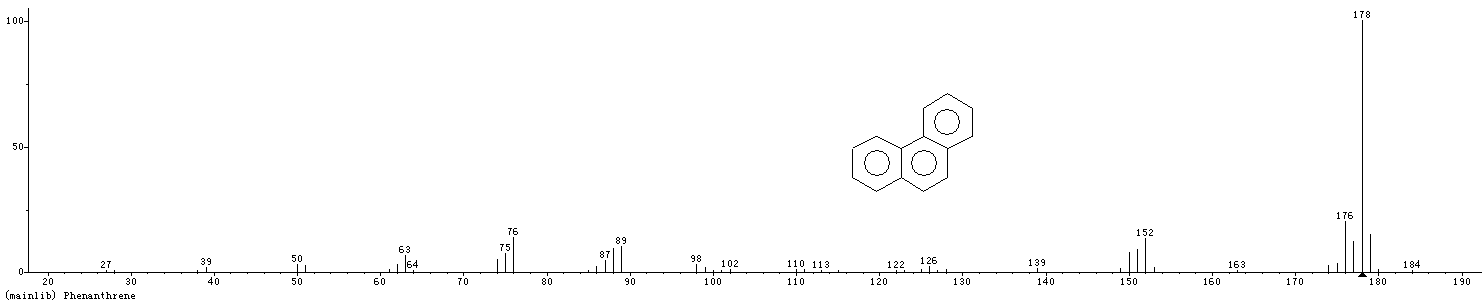

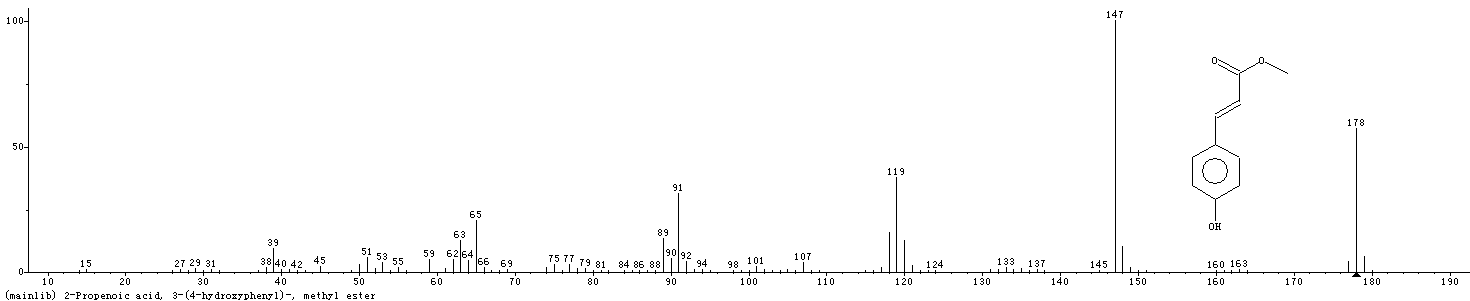


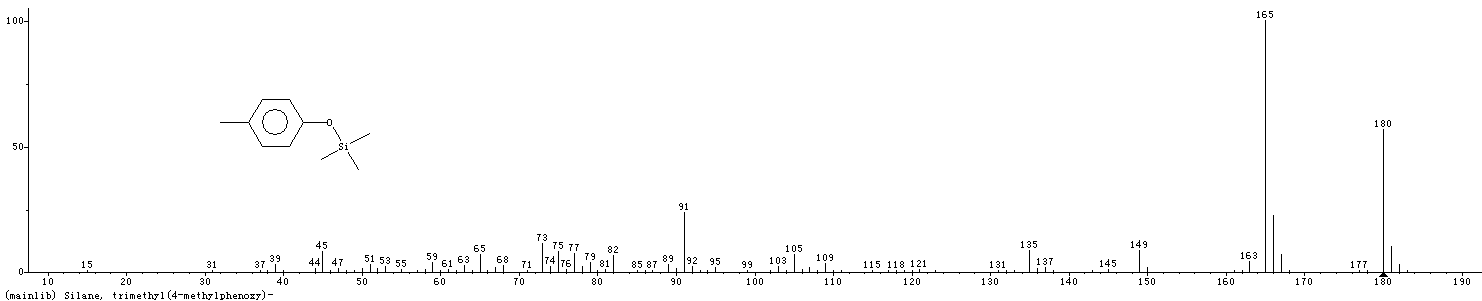


Figure S7 Phenanthrene was cultivated with *Klebsiella* sp. LZ6 for 30 day under anaerobic conditions, and the supernatant was subjected to GC/MS analysis. Mass spectrogram of 4- hydroxybenzenemethanol -TMS derivative (RT-10.307min)

Figure S8 Mass spectrogram of 4-hydroxybenzenemethanol-TMS derivative standard.


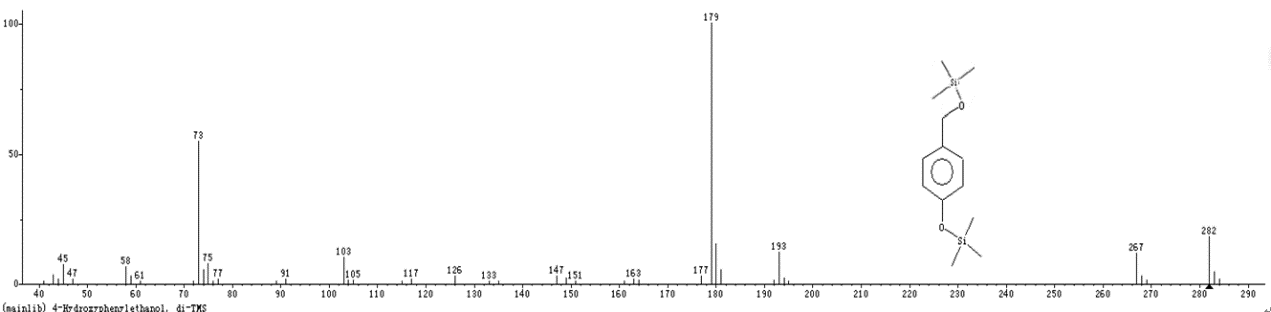


Table S1 Characters of physiology and biochemistry (+ Positive reaction; +w weak reaction; - negative reaction.The strains did not assimilate D-cellobiose, D-turanose, α-D-lactose, N-acetyl-β-D-mannosamine, N-Acetyl-D-galactosamine, D-aspartic acid, Gelatin, L-serine, Mucic acid, D-saccharic acid, Methyl pyruvate, D-lactic acid methyl ester, α-hydroxy-butyric acid, α-keto-butyric acid, Acetoacetic acid, Formic acid, 8% NaCl, Lithium chloride, Sodium butyrate, Sodium bromate.)

| Tested item | Reaction | Tested item | Reaction | | Tested item | Reaction | |
| --- | --- | --- | --- | --- | --- | --- | --- |
| Dextrin | - | D-maltose | | +w | D-trehalose | | +w |
| D-cellobiose | + | Gentiobiose | | + | Sucrose | | + |
| Stachyose | +w | D-raffinose | | + | D-melibiose | | + |
| β-methyl-D-glucoside | + | D-salicin | | + | N-acetyl-D-glucosamine | | + |
| N-acetyl neuraminic acid | +w | α-D-glucose | | + | D-mannose | | + |
| D-fructose | + | D-galactose | | + | 3-methyl glucose | | +w |
| D-foucose | +w | L-foucose | | +w | L-rhamnose | | +w |
| Inosin | - | D-sorbitol | | + | D-mannitol | | + |
| D-arabito | + | Myo-inositol | | +w | Glycerol | | - |
| D-glucose-6-PO4 | + | D-fructose-6-PO4 | | + | D-serine | | + |
| Glycyl-L-proline | - | D-alanine | | - | L-arginine | | - |
| L-aspartic acid | - | L-glutamic acid | | - | L-histidine | | - |
| L-pyroglutamic acid | - | Pectin | | + | D-galacturonic acid | | + |
| L-galactonic acid lactone | - | D-gluconic acid | | + | D-glucuronic acid | | + |
| Glucuronamid | + | Quinic acid | | - | p-hydroxy-  phenylacetic acid | | - |
| L-lactic acid | - | Citric acid | | - | α-keto-glutaric acid | | - |
| D-malic acid | + | L-malic acid | | - | Bromo-succinic acid | | - |
| Tween-40 | - | γ-amino-butryric acid | | - | β-hydroxy-D,L-butyric acid | | - |
| Propionic acid | - | Acetic acid | | - | pH6 | | +w |
| pH5 | - | 1% NaCl | | + | 4% NaCl | | - |
| 1% Sodium lactate | + | FusidicaAcid | | - | D-serine | | + |
| Troleandomycin | +w | Rifamycin SV | | + | Minocycline | | - |
| Lincomycin | + | Guanidine HCl | | + | Niaproof 4 | | - |
| Vancomycin | + | Tetrazolium violet | | + | Tetrazolium blue | | +w |
| Nalidixic acid | - | Potassium tellurite | | - | Aztreonam | | + |
